# Supplementary material
Source: PubMed Central journal article supplement (PMC4566401)
Supplement: i1552-5783-56-10-5880-s01.pdf [file i1552-5783-56-10-5880-s01.pdf]

## Supplemental Tables

**S1. Table 1. Liquid chromatography gradient for measuring vitamin D metabolites using LC/MS/MS\***

| Time | Organic phase % |
|------|-----------------|
| 0    | 30%             |
| 2    | 30%             |
| 3    | 75%             |
| 10   | 80%             |
| 11   | 30%             |
| 12   | 30%             |

\* Mobile phases are (water phase) A-10% v/v acetonitril in water containing 0.1% formic acid; (organic phase) B-100% methanol. Liquid chromatographic column is Waters Acquity 1.7  $\mu$ m 150 mm x 2.1 BEH C18 column. 250  $\mu$ L/min flow rate.

**S2. Table 2. MS/MS parameters for measuring vitamin D metabolites using LC/MS/MS\***

| Metabolite Name | Q1 Mass (Da) | Q3 Mass (Da) | DP (V) | CE (V) | CXP (V) |
|-----------------|--------------|--------------|--------|--------|---------|
| 25(OH)D2        | 570.3        | 298.1        | 60     | 32     | 8       |
| 25(OH)D3        | 558.3        | 298.1        | 50     | 32     | 8       |
| 1,25(OH)2D2     | 586.3        | 314          | 60     | 35     | 8       |
| 1,25(OH)2D3     | 574.3        | 314          | 60     | 38     | 8       |
| d6-(OH)D3       | 564.3        | 298.1        | 55     | 35     | 8       |
| d6-(OH)2D3      | 580.3        | 314          | 55     | 35     | 8       |
| CUDA            | 341.2        | 216.3        | 60     | 35     | 4       |
| 24,25(OH)2D3    | 574.3        | 298.1        | 60     | 30     | 8       |
| Vit D2          | 572.3        | 298.1        | 60     | 30     | 8       |
| Vit D3          | 560.3        | 298.1        | 55     | 32     | 6       |
| Calcipotriol    | 570.3        | 314.1        | 55     | 30     | 8       |

\* The 4000 QTrap MS/MS system (AB Sciex, Redwood City, CA) was used for this measurement. The instrument was operated under negative electrospray mode with MRM scan mode. The other parameters for the source are nebulise gas 50 psi, turbo gas 60 psi, curtain gas at 25 psi; ion spray voltage is -4500 V, source temperature is 600 °C.
